# Supplementary material
Source: PubMed Central journal article supplement (PMC4789979)
Supplement: sche002178.ww1_default.pdf [file sche002178.ww1_default.pdf]

**Appendix 1: Resource use during intrapartum care\* [posted as supplied by author]**

| Resource use variable                                               | Obstetric Unit (OU) | Home                      | Freestanding Midwifery Unit (FMU) | Alongside Midwifery Unit (AMU) |
|---------------------------------------------------------------------|---------------------|---------------------------|-----------------------------------|--------------------------------|
| <b>HOME</b>                                                         |                     |                           |                                   |                                |
| Homebirth packs                                                     | 0.0 (0.0)           | 1.0                       | 0.0 (0.0)                         | 0.0 (0.0)                      |
| Staff travel to homebirth – distance 23 miles return trip           | 0.0 (0.0)           | 1.0                       | 0.0 (0.0)                         | 0.0 (0.0)                      |
| <b>ALL 'non-OU' UNITS</b>                                           |                     |                           |                                   |                                |
| Duration of labour care prior to transfer (hours)                   | 0.0 (0.0)           | 1.20 <sup>¥</sup> ( 2.92) | 1.45 <sup>¥</sup> (3.36 )         | 1.72 <sup>¥</sup> (3.61)       |
| Transfer duration (hours)                                           | 0.0 (0.0)           | 0.10 <sup>§</sup> (0.24)  | 0.13 <sup>§</sup> (0.27)          | 0.05 <sup>§</sup> ( 0.12)      |
| <b>Mode of transfer</b>                                             |                     |                           |                                   |                                |
| Ambulance                                                           | 0.0 (0.0)           | 0.17 ( 0.38)              | 0.21 (0.41)                       | 0.0 (0.0)                      |
| Private car                                                         | 0.0 (0.0)           | 0.031 (0.17)              | 0.005 (0.069)                     | 0.0013 (0.0036)                |
| Wheelchair or trolley                                               | 0.0 (0.0)           | 0.0 (0.0)                 | 0.0 (0.0)                         | 0.21 (0.41)                    |
| Bed                                                                 | 0.0 (0.0)           | 0.0 (0.0)                 | 0.0 (0.0)                         | 0.021 0.143                    |
| Rapid response ambulance car                                        | 0.0 (0.0)           | 0.00025 (0.016)           | 0.0 (0.0)                         | 0.0 (0.0)                      |
| Helicopter                                                          | 0.0 (0.0)           | 0.00006 (0.008)           | 0.0 (0.0)                         | 0.0 (0.0)                      |
| Taxi                                                                | 0.0 (0.0)           | 0.0003 (0.019)            | 0.00009 (0.0009)                  | 0.0 (0.0)                      |
| No physical transfer                                                | 0.0 (0.0)           | 0.0 (0.0)                 | 0.0 (0.0)                         | 0.0011 (0.034)                 |
| <b>Duration of labour care after transfer (hours)</b>               |                     |                           |                                   |                                |
| Duration of labour care after transfer (hours)                      | 0.0 (0.0)           | 1.46 <sup>€</sup> (3.71)  | 1.45 <sup>€</sup> (3.58)          | 1.81 <sup>€</sup> (4.01)       |
| <b>ALL UNITS</b>                                                    |                     |                           |                                   |                                |
| Duration of labour care from start to finish if no transfer (hours) | 9.01 (6.22)         | 6.61 (5.31)               | 7.49 (5.68)                       | 7.92 (5.92)                    |

| <i>Mode of birth</i>                           |                |                  |                 |                  |
|------------------------------------------------|----------------|------------------|-----------------|------------------|
| Spontaneous vertex birth                       | 0.738 (0 .49)  | 0.928 (0.31)     | 0.907 (0.29)    | 0.859 (0.47)     |
| Vaginal breech birth                           | 0.002 (0.04)   | 0.004 ( 0.06)    | 0.004 ( 0.058)  | 0.002 ( 0.03)    |
| Ventouse                                       | 0.081 (0.26)   | 0.021 ( 0.14)    | 0.027 (0.16)    | 0.048 (0.21)     |
| Forceps                                        | 0.068 (0.24)   | 0.021 (0 .15)    | 0.029 (0 .17)   | 0.047 (0.20)     |
| Caesarean section                              | 0.11.1 (0.31)  | 0.028 (0 .16)    | 0.035 ( 0.18)   | 0.044 ( 0.36)    |
| <i>Procedures related to intrapartum care</i>  |                |                  |                 |                  |
| Augmentation                                   | 0.235 (0.42)   | 0.054 (0 .23)    | 0.071 ( 0 .26)  | 0.103 (0 .30)    |
| Epidural/Spinal                                | 0.307 ( 0.45)  | 0.083 (0.27)     | 0.106 (0.31)    | 0.153 (0.35)     |
| General Anaesthetic                            | 0.015 (1.12)   | 0.005 (0.067)    | 0.005 (0.073)   | 0.006 (0.07)     |
| Active Management of the third stage of labour | 0.939 (0.23)   | 0.687 (0.46)     | 0.779 (0.42)    | 0.859 (0.46)     |
| Episiotomy                                     | 0.193 (0.39)   | 0.054 (0.23)     | 0.086 (0.28)    | 0.131 (0.33)     |
| Perineal trauma                                | 0.032 (0.17)   | 0.19 (0.14)      | 0.023 (0.14)    | 0.032 (0.17)     |
| Extracorporeal membrane oxygenation            | 0.0001 (0.014) | 0.00018 ( 0.002) | 0.00018 (0.19)  | 0.00049 ( 0.04)  |
| Total body cooling                             | 0.0005 (0.02)  | 0.00045 (0.02)   | 0.00032 ( 0.02) | 0.00031 ( 0.017) |
| Care for a stillbirth                          | 0.0002 (0.012) | 0.0003 (0.018)   | 0.0004 (0.019)  | 0.0001 ( 0.007)  |
| Neonatal death                                 | 0.0003 (0.017) | 0.0003 (0.027)   | 0.0004 (0.02)   | 0.0001 ( 0.0176) |

\* Values are given as means (standard deviations). Where numbers are extremely small they are shown to up to 5 decimal places, otherwise to three decimal places to reflect consistency in presentation of the results with the prospective cohort study. \* Women that were not transferred from their planned place of birth were excluded from this analysis: duration of labour care (hours) prior to transfer was calculated as: 5.71 (home), 6.68 (FMU), 6.5 (AMU).

§ Women that were not transferred from their planned place of birth were excluded from this analysis: duration of transfer (hours) was calculated as: 0.487 (home), 0.592 (FMU), 0.175 (AMU) which is 29 minutes (home), 35 minutes (FMU) and 10 minutes (AMU) respectively.

€ Women that were not transferred from their planned place of birth were excluded from this analysis: duration of labour care (hours) after transfer was calculated as: 6.8 (home), 6.6 (FMU), 6.89 (AMU).
