# Supplementary material
Source: PubMed Central journal article supplement (PMC4789979)
Supplement: sche002178.ww2_default.pdf [file sche002178.ww2_default.pdf]

**Appendix 2: Unit costs per resource item (£ sterling, 2009/10 prices) [posted as supplied by author]**

| Resource item (unit)                                                                            | Unit cost or range                                                  | Source of unit cost                                                                      |
|-------------------------------------------------------------------------------------------------|---------------------------------------------------------------------|------------------------------------------------------------------------------------------|
| <b>GENERIC COSTS APPLIED TO DURATION VARIABLES</b>                                              |                                                                     |                                                                                          |
| <b>Unit financial overheads (hour)</b>                                                          |                                                                     |                                                                                          |
| Obstetric Unit                                                                                  | 63.7 (50.9 – 76.4)                                                  | Primary cost data collection                                                             |
| Home                                                                                            | 0.0                                                                 | Primary cost data collection                                                             |
| Freestanding Midwifery Unit                                                                     | 55.4 (44.3 – 66.5)                                                  | Primary cost data collection                                                             |
| Alongside Midwifery Unit                                                                        | 54.4 (43.5 – 65.3)                                                  | Primary cost data collection                                                             |
| <b>Midwifery staffing (hour)</b>                                                                |                                                                     |                                                                                          |
| Obstetric Unit                                                                                  | 81.3<br>Intermittent care 65%                                       | PSSRU Unit Costs of Health and Social care 2010<br>Primary cost data collection for CNST |
| Home                                                                                            | 81.3<br>Continuous care plus one extra midwife for an hour at birth | PSSRU Unit Costs of Health and Social care 2010<br>Primary cost data collection for CNST |
| Freestanding Midwifery Unit                                                                     | 81.3<br>Continuous care 100%                                        | PSSRU Unit Costs of Health and Social care 2010<br>Primary cost data collection for CNST |
| Alongside Midwifery Unit                                                                        | 81.3<br>Continuous care                                             | PSSRU Unit Costs of Health and Social care 2010<br>Primary cost data collection for CNST |
| <b>Medical staffing (hour)</b>                                                                  |                                                                     |                                                                                          |
| Medical Consultant (hour)                                                                       | 389.4                                                               | PSSRU Unit Costs of Health and Social care 2010<br>Primary cost data collection for CNST |
| Registrar (hour)                                                                                | 179.5                                                               | PSSRU Unit Costs of Health and Social care 2010<br>Primary cost data collection for CNST |
| Foundation House Officer (F2) (hour)<br>Senior House Officer/ Specialty or Core Training year 1 | 141.8                                                               | PSSRU Unit Costs of Health and Social care 2010<br>Primary cost data collection for CNST |
| <b>COSTS INCURRED FOR A PLANNED BIRTH AT HOME</b>                                               |                                                                     |                                                                                          |
| Homebirth packs                                                                                 | 34.3                                                                | Primary cost data collection                                                             |
| Staff travel to homebirth – distance 23 miles return trip                                       | 23.2                                                                | Primary cost data collection                                                             |
| <b>COSTS INCURRED FOR PLANNED ‘NON-OU BIRTHS’ IF TRANSFERRED TO AN OU</b>                       |                                                                     |                                                                                          |
| <b>Mode of transfer (per hour)</b>                                                              |                                                                     |                                                                                          |
| Ambulance                                                                                       | 402.0                                                               | PSSRU Unit Costs of Health and Social care 2010<br>DH reference costs                    |
| Private car                                                                                     | 0.0                                                                 | Cost not attributed to NHS                                                               |
| Wheelchair or trolley                                                                           | 0.01                                                                | PSSRU Unit Costs of Health and Social care 2010                                          |

| <b>COSTS INCURRED FOR PLANNED 'NON-OU BIRTHS' IF TRANSFERRED TO AN OU</b> |        |                                                                       |
|---------------------------------------------------------------------------|--------|-----------------------------------------------------------------------|
| <b><i>Mode of transfer (per hour)</i></b>                                 |        |                                                                       |
| Bed                                                                       | 0.01   | PSSRU Unit Costs of Health and Social care 2010                       |
| Rapid response ambulance car                                              | 214    | PSSRU Unit Costs of Health and Social care 2010<br>DH reference costs |
| Helicopter                                                                | 144.5  | Primary data collection<br>(NHS staff costs only)                     |
| Taxi                                                                      | 0.0    | Cost not attributed to NHS                                            |
| No physical transfer                                                      | 0.0    | Cost not attributed to NHS                                            |
| <b>COSTS INCURRED FOR CARE DURING LABOUR AND BIRTH</b>                    |        |                                                                       |
| <b><i>Mode of birth</i></b>                                               |        |                                                                       |
| Spontaneous vertex birth                                                  |        |                                                                       |
| Obstetric Unit                                                            | 26.3   | Primary cost data collection                                          |
| Home                                                                      | 28.5   | Primary cost data collection                                          |
| Freestanding Midwifery Unit                                               | 29.3   | Primary cost data collection                                          |
| Alongside Midwifery unit                                                  | 29.3   | Primary cost data collection                                          |
| Vaginal breech birth                                                      | 99.1   | Primary cost data collection                                          |
| Ventouse                                                                  | 429.2  | Primary cost data collection                                          |
| Forceps                                                                   | 569.9  | Primary cost data collection                                          |
| Caesarean section                                                         | 1052.6 | Primary cost data collection                                          |
| <b><i>Procedures related to intrapartum care</i></b>                      |        |                                                                       |
| Augmentation                                                              | 159.1  | Primary cost data collection                                          |
| Epidural/spinal                                                           | 311.1  | Primary cost data collection                                          |
| General anaesthetic                                                       | 846.5  | Primary cost data collection                                          |
| Active management of the third stage of labour                            | 4.1    | Primary cost data collection                                          |
| Episiotomy                                                                | 24.6   | Primary cost data collection                                          |
| Perineal trauma                                                           | 595.3  | Primary cost data collection                                          |
| Extracorporeal membrane oxygenation                                       | 1651.0 | Primary cost data collection                                          |
| Total body cooling                                                        | 2110.0 | Primary cost data collection                                          |
| Care following a stillbirth                                               | 644    | Primary cost data collection                                          |
| Care following a neonatal death                                           | 644    | Primary cost data collection                                          |

| <b>POST NATAL AND HIGHER LEVEL CARE FOR THE MOTHER</b>                             |      |                    |
|------------------------------------------------------------------------------------|------|--------------------|
| Postnatal care (days)                                                              | 95   | DH reference costs |
| High dependency care following birth provided within the labour ward (per 4 hours) | 80   | DH reference costs |
| Admission to intensive care unit (days)                                            | 560  | DH reference costs |
| Admission to high dependency unit (days)                                           | 1525 | DH reference costs |
| Admission to specialist care (days)                                                | 400  | DH reference costs |
| <b>HIGHER LEVEL OF CARE FOR THE BABY</b>                                           |      |                    |
| Admission to neonatal intensive care unit (days)                                   | 1081 | DH reference costs |
| Admission to neonatal high dependency unit (days)                                  | 759  | DH reference costs |
| Admission to neonatal specialist care (days)                                       | 429  | DH reference costs |
