# Supplementary material
Source: PubMed Central journal article supplement (PMC4789979)
Supplement: sche002178.ww3_default.pdf [file sche002178.ww3_default.pdf]

**Appendix 3: Cost per woman adjusted for socio-demographic and other factors: generalised linear regression\*** [posted as supplied by author]

| <b>Covariate</b>                         | <b>Coefficient</b> | <b>Standard Error</b> | <b>P value</b> | <b>(95% CI)</b>      |
|------------------------------------------|--------------------|-----------------------|----------------|----------------------|
| Planned place birth: OU (referent)       | -                  |                       |                |                      |
| Planned place birth: home                | -310.0             | 11.2                  | 0.000          | (-332.05 to -287.9)  |
| Planned place birth: FMU                 | -130.1             | 13.4                  | 0.000          | (-156.5 to -103.7)   |
| Planned place birth: AMU                 | -134.4             | 12.2                  | 0.000          | (-158.5 to -110.4)   |
| Parity: 0 previous pregnancy (referent)  | -                  |                       |                |                      |
| Parity: 1 previous pregnancy             | -917.7             | 11.9                  | 0.000          | (-941.1 to -894.5)   |
| Parity: 2 previous pregnancies           | -1037.7            | 13.3                  | 0.000          | (-1063.8 to -1011.6) |
| Parity: 3+ previous pregnancies          | -1058.3            | 15.4                  | 0.000          | (-1088.5 to -1028.2) |
| 37 weeks gestation                       | 54.7               | 25.4                  | 0.031          | (4.9 to 104.5)       |
| 38 weeks gestation                       | -56.1              | 13.3                  | 0.000          | (-82.2 to -30.0)     |
| 39 weeks gestation                       | -72.4              | 9.5                   | 0.000          | (-91.2 to -53.7)     |
| 40 weeks gestation (referent)            | -                  |                       |                |                      |
| 41 weeks gestation                       | 112.2              | 11.3                  | 0.000          | (89.9 to 134.6)      |
| 42-44 weeks gestation                    | 462.5              | 48.6                  | 0.000          | (367.2 to 557.9)     |
| Married (referent)                       | -                  |                       |                |                      |
| Single/unsupported partner               | 45.7               | 17.1                  | 0.008          | (12.1 to 79.2)       |
| BMI not recorded                         | 50.1               | 10.9                  | 0.000          | (28.6 to 71.6)       |
| BMI 10-18                                | -19.2              | 24.7                  | 0.438          | (-67.6 to 29.3)      |
| BMI 19-24 (referent)                     | -                  |                       |                |                      |
| BMI 25-29                                | 35.9               | 9.9                   | 0.000          | (16.4 to 55.4)       |
| BMI 30-35                                | 33.1               | 14.7                  | 0.024          | (4.3 to 61.8)        |
| White British (referent)                 | -                  |                       |                |                      |
| Indian/Bangladeshi                       | 42.0               | 27.9                  | 0.131          | (-12.5 to 96.7)      |
| Pakistani                                | 56.3               | 30.3                  | 0.063          | (-3.1 to 115.8)      |
| Black Caribbean                          | -62.9              | 36.3                  | 0.083          | (-134.1 to 8.2)      |
| Black African                            | 59.2               | 30.3                  | 0.051          | (-0.2 to 118.8)      |
| Mixed                                    | 27.0               | 32.1                  | 0.400          | (-35.8 to 89.9)      |
| Other                                    | 29.4               | 24.1                  | 0.223          | (-17.9 to 76.7)      |
| Maternal age <20                         | -159.8             | 22.7                  | 0.000          | (-204.5 to -115.2)   |
| Maternal age 20-24                       | -44.8              | 12.1                  | 0.000          | (-68.7 to -20.9)     |
| Maternal age 25-29 (referent)            | -                  |                       |                |                      |
| Maternal age 30-34                       | 37.6               | 10.3                  | 0.000          | (17.3 to 57.9)       |
| Maternal age 35-39                       | 58.5               | 11.8                  | 0.000          | (35.2 to 81.8)       |
| Maternal age 40-60                       | 151.3              | 24.8                  | 0.000          | (102.7 to 199.9)     |
| IMD 0.37-8.31 (least deprived -referent) | -                  |                       |                |                      |
| IMD 8.32-13.73                           | 15.4               | 13.0                  | 0.234          | (-10.0 to 40.9)      |
| IMD 13.74-21.21                          | 30.6               | 12.8                  | 0.017          | (5.4 to 55.8)        |
| IMD 21.22-34.41                          | 33.9               | 12.4                  | 0.007          | (9.4 to 58.3)        |
| IMD 34.42-85.46 (most deprived)          | 24.0               | 12.0                  | 0.047          | (0.3 to 47.7)        |
| Fluent in English (referent)             | -                  |                       |                |                      |
| Some English                             | 19.2               | 24.6                  | 0.435          | (-29.0 to 67.4)      |
| No English                               | -39.9              | 40.2                  | 0.322          | (-118.8 to 39.0)     |
| Constant                                 | 2004.7             | 17.7                  | 0.000          | (1969.9 to 2039.5)   |

BMI denotes body mass index; IMD denotes Index of Multiple Deprivation.

\*UK Sterling (2009/10 prices); estimated using a gamma distribution and an identity link function

n= 62036; AIC=16.26562
